# Supplementary material for: Dealing with iron metabolism in rice: from breeding for stress tolerance to biofortification
Source: PubMed Central journal article supplement (PMC5452141; doi:10.1590/1678-4685-gmb-2016-0036), 2017-03-16
Supplement: 1415-4757-gmb-1678-4685-GMB-2016-0036-Suppl01.pdf [file 1415-4757-gmb-1678-4685-GMB-2016-0036-Suppl01.pdf]

**Table S1** - Positions of the QTLs related to Fe metabolism shown in Figure 3.

| Characteristic                 | Chromosome <sup>a</sup> | Marker <sup>b</sup>       | LOD    | Additive effect <sup>c</sup>           | Details                                                                                                  | References               |
|--------------------------------|-------------------------|---------------------------|--------|----------------------------------------|----------------------------------------------------------------------------------------------------------|--------------------------|
| Fe accumulation in rice grains | 1                       | RM246-RM5461              | 3,160  | -1,6312                                | Explained variance (%): 15.7                                                                             | Du et al., 2013          |
|                                | 1                       | RM431                     |        |                                        | Gene and locus: <i>OSZIP1</i> Os01g0972200<br>Position (cM): 41.5;                                       | Nawaz et al., 2015       |
|                                | 1                       | AD121                     | 2,71   |                                        | Explained variance (%): 6.4                                                                              | Vreugdenhil et al., 2004 |
|                                | 1                       | RM243-RM488               | 21,9   | -59.05                                 | R <sup>2</sup> (%) <sup>d</sup> : 69                                                                     | Anuradha et al., 2012    |
|                                | 1                       | RM488-RM490               | 21,9   | -59.04                                 | R <sup>2</sup> (%) <sup>d</sup> : 69.2                                                                   | Anuradha et al., 2012    |
|                                | 1                       | C949+0                    | 5,1    |                                        | R <sup>2</sup> (%) <sup>d</sup> : 16.2                                                                   | Norton et al., 2010      |
|                                | 2                       | RM145, RM555 and RM279    |        |                                        | Gene and locus: 1. <i>OsHMA4</i> Os02g0196600; 2. Aspartate aminotransferase                             | Nawaz et al., 2015       |
|                                | 2                       | RM279 and RM555           |        |                                        | Gene and locus: <i>OsACA2</i> Os02g0176700<br>Position (cM): 9.6;                                        | Nawaz et al., 2015       |
|                                | 2                       | BH144                     | 2,96   |                                        | Explained variance (%): 7.3                                                                              | Vreugdenhil et al., 2004 |
|                                | 3                       | MRG4864/RM5864 and RM3400 |        |                                        | Gene and locus: <i>OsZIP2</i> Os03g0411800                                                               | Nawaz et al., 2015       |
|                                | 3                       | RM8203                    |        |                                        | Gene and locus: <i>OsCNGC14</i> Os03g0758300                                                             | Nawaz et al., 2015       |
|                                | 3                       | R1618-7                   | 4,5    |                                        | R <sup>2</sup> (%) <sup>d</sup> : 21.4                                                                   | Norton et al., 2010      |
|                                | 4                       | RM3217                    |        |                                        | Gene and locus: <i>OsZIP3</i> Os04g0613000                                                               | Nawaz et al., 2015       |
|                                | 4                       | RM349+0                   | 3,4    |                                        | R <sup>2</sup> (%) <sup>d</sup> : 9.7                                                                    | Norton et al., 2010      |
|                                | 5                       | RM161                     |        |                                        | Gene and locus: 1. <i>OsZIP5</i> Os05g0472700; 2. <i>OsZIP9</i> Os05g0472400                             | Nawaz et al., 2015       |
|                                | 5                       | RM574-RM122               | 25,3   | -59.1                                  | R <sup>2</sup> (%) <sup>d</sup> : 69.2                                                                   | Anuradha et al., 2012    |
|                                | 6                       | RM340-RM494               | 2,05   | -1,3498                                | Explained variance (%): 10.6                                                                             | Du et al., 2013          |
|                                | 6                       | RM162                     |        |                                        | Gene and locus: 1. <i>OsHMA2</i> Os06g0700700; 2. ABC transporter domain containing protein Os06g0607700 | Nawaz et al., 2015       |
|                                | 7                       | RM1335                    |        |                                        | Gene and locus: 1. <i>OsNAS3</i> Os07g0689600; 2. Peroxidase Os07g0677300; 3. Potassium transporter 7    | Nawaz et al., 2015       |
|                                | 7                       | RM234-RM248               | 27,9   | 59,1                                   | R <sup>2</sup> (%) <sup>d</sup> : 69                                                                     | Anuradha et al., 2012    |
| 7                              | RM248-RM8007            | 27,2                      | 59,1   | R <sup>2</sup> (%) <sup>d</sup> : 69   | Anuradha et al., 2012                                                                                    |                          |
| 7                              | R1440+0                 | 4,9                       |        | R <sup>2</sup> (%) <sup>d</sup> : 15.5 | Norton et al., 2010                                                                                      |                          |
| 8                              | RM4085-RM1111           | 4,14                      | 1,9368 | Explained variance (%): 22.3           | Du et al., 2013                                                                                          |                          |

| Characteristic           | Chromosome <sup>a</sup> | Marker <sup>b</sup> | LOD   | Additive effect <sup>c</sup>           | Details                                                     | References            |
|--------------------------|-------------------------|---------------------|-------|----------------------------------------|-------------------------------------------------------------|-----------------------|
| Tolerance to Fe toxicity | 10                      | RM271               |       |                                        | Gene and locus: Os10g0456800 CHY zinc finger family protein | Nawaz et al., 2015    |
|                          | 12                      | RM19                |       |                                        | Gene and locus: <i>OsACA9</i> Os12g0136900                  | Nawaz et al., 2015    |
|                          | 12                      | RM17–RM260          | 33,8  | -59.5                                  | R <sup>2</sup> (%) <sup>d</sup> : 71                        | Anuradha et al., 2012 |
|                          | 12                      | RM 260–RM7102       | 33,4  | -59.5                                  | R <sup>2</sup> (%) <sup>d</sup> : 71                        | Anuradha et al., 2012 |
|                          | 1                       | STSI16-RM220        |       |                                        |                                                             | Shimizu, 2009         |
|                          | 1                       | RG220B-RG810        |       |                                        |                                                             | Shimizu, 2009         |
|                          | 1                       | id1008684           |       | 0,82                                   | R <sup>2</sup> (%) <sup>d</sup> : 10.6                      | Wu et al., 2014       |
|                          | 1                       | id1021920           |       | -0.72                                  | R <sup>2</sup> (%) <sup>d</sup> : 12.7                      | Wu et al., 2014       |
|                          | 1                       | R2417+0             | 4,4   |                                        | R <sup>2</sup> (%) <sup>d</sup> : 12.4                      | Norton et al., 2010   |
|                          | 1                       | RM034–RM246         | 7,62  | -0,61                                  | R <sup>2</sup> (%) <sup>d</sup> : 18.5                      | Dufey et al.,2009     |
|                          | 1                       | RM443–RM403         | 7,92  | -0,67                                  | R <sup>2</sup> (%) <sup>d</sup> : 18.1                      | Dufey et al.,2009     |
|                          | 1                       | RM265–RM315         | 3,78  | 0,4                                    | R <sup>2</sup> (%) <sup>d</sup> : 8.1                       | Dufey et al.,2009     |
|                          | 2                       | RM221-RM6           |       |                                        |                                                             | Shimizu, 2009         |
|                          | 2                       | id2013434           |       | 0,94                                   | R <sup>2</sup> (%) <sup>d</sup> : 10.3                      | Wu et al., 2014       |
|                          | 2                       | RM324–RM550         | 8,53  | -1,05                                  | R <sup>2</sup> (%) <sup>d</sup> : 35.7                      | Dufey et al.,2009     |
|                          | 3                       | RG409+2             | 3,2   |                                        | R <sup>2</sup> (%) <sup>d</sup> : 10.6                      | Norton et al., 2010   |
|                          | 4                       | id4002852           |       | 0,85                                   | R <sup>2</sup> (%) <sup>d</sup> : 18.7                      | Wu et al., 2014       |
|                          | 4                       | id4005867           |       | 0,69                                   | R <sup>2</sup> (%) <sup>d</sup> : 9.9                       | Wu et al., 2014       |
|                          | 6                       | RZ516+0             | 3,4   |                                        | R <sup>2</sup> (%) <sup>d</sup> : 10.4                      | Norton et al., 2010   |
|                          | 7                       | RC-RM11             |       |                                        |                                                             | Shimizu, 2009         |
|                          | 7                       | id7000519           |       | 1,11                                   | R <sup>2</sup> (%) <sup>d</sup> : 11.7                      | Wu et al., 2014       |
|                          | 8                       | RM44-RM42           |       |                                        |                                                             | Shimizu, 2009         |
|                          | 11                      | RM254–RM224         | 3,74  | -0,36                                  | R <sup>2</sup> (%) <sup>d</sup> : 10.5                      | Dufey et al.,2009     |
| 11                       | RM224–RM144             | 3,75                | -0,31 | R <sup>2</sup> (%) <sup>d</sup> : 7.5  | Dufey et al.,2009                                           |                       |
| 11                       | RM004b–RM019            | 5,24                | 0,75  | R <sup>2</sup> (%) <sup>d</sup> : 17.6 | Dufey et al.,2009                                           |                       |
| 12                       | id12010050              |                     | 0,96  | R <sup>2</sup> (%) <sup>d</sup> : 10.6 | Wu et al., 2014                                             |                       |

a Chromosome number where the QTL were detected

b Marker in which is located the most probable position of the QTL

c Effect of substituting a single allele from one parent to another. Positive value indicates that the allele contributes to increase the value of the parameter and negative value indicates that the allele contributes to increase the value of the parameter

d Part of the phenotypic variation explained by the QTL (%)

LOD: likelihood ratio

#### References for Table S1:

- Anuradha K, Agarwal S, Rao YV, Rao KV, Viraktamath BC and Sarla N (2012) Mapping QTLs and candidate genes for iron and zinc concentrations in unpolished rice of Madhukar×Swarna RILs. *Gene* 508:233–240.
- Du J, Zeng D, Wang B, Qian Q, Zheng S and Ling HQ (2013) Environmental effects on mineral accumulation in rice grains and identification of ecological specific QTLs. *Environ Geochem Health* 35:161–170.
- Dufey I, Hakizimana P, Draye X, Lutts S and Bertin P (2009) QTL mapping for biomass and physiological parameters linked to resistance mechanisms to ferrous iron toxicity in rice. *Euphytica* 167:143–160.
- Nawaz Z, Kakar KU, Li X, Li S, Zhang B, Shou H and Shu Q (2015) Genome-wide association mapping of Quantitative Trait Loci (QTLs) for contents of eight elements in Brown Rice (*Oryza sativa* L.). *J Agric Food Chem* 63:8008–

8016.

- Norton GJ, Deacon CM, Xiong L, Huang S, Meharg AA, Price AH (2010) Genetic mapping of the rice ionome in leaves and grain: Identification of QTLs for 17 elements including arsenic, cadmium, iron and selenium. *Plant Soil* 329:139–153.
- Shimizu A (2009) QTL analysis of genetic tolerance to iron toxicity in rice (*Oryza sativa* L.) by quantification of bronzing bcore. *J New Seeds* 10:171–179.
- Vreugdenhil D, Aarts MGM, Koornneef M, Nelissen H and Ernst WHO (2004) Natural variation and QTL analysis for cationic mineral content in seeds of *Arabidopsis thaliana*. *Plant Cell Environ* 27:828–839.
- Wu L, Shhadi MY, Gregorio G, Matthus E, Becker M and Frei M (2014) Genetic and physiological analysis of tolerance to acute iron toxicity in rice. *Rice* 7:8.
